# Supplementary material for: Sample labeling and classification method of hyperspectral remote sensing images based on texture features and semi-supervised learning
Source: Copernicus journal article supplement (doi:10.5194/gi-2022-24), 2023-01-24
Supplement: Supplementary file [file gi-2022-24-AC4-supplement.pdf]

**Dear reviewer RC4:**

Thank you very much for the insightful comments. Thank you for giving us a choice to correct the shortcoming of our manuscript. We already carefully read your comments and revised the manuscript according to your suggestions. We hope that this revision will make our manuscript meet the publisher. The responses to the comments point by point are listed below. Please feel free to contact us with any questions. If the revised manuscript maybe exists the shortcomings, please tell us. We will try our best to continue to revise our manuscript in order to improve our manuscript. Really thank your insightful comments and help again!

Yours sincerely,

Regards,

Xiangbing Zhou

**Reviewer #RC4:**

The proposal is interesting, and the experiments conducted are good, however the manuscript presents many flaws in its present form.

1. In the abstract, it is better to improve some sentences and the innovation and achievement of the paper that comprise it from other similar work is ambiguous and is better to add to the abstract. The introduction is not organized well and the lack of consistency in the story's narration is apparent. Please improve it if possible. Some modifications in terms of eliminating such general and clear information are needed.
2. Literature review is a little bit insufficient, please add more recent good works by researchers..
3. The quality of the figure should be improved as much as possible. For instance, in Fig.1,...
4. What are the limitations behind this study? This topic should be highlighted in the Conclusion of manuscript.
5. The conclusions should be more concrete with data. Please improve them.

**COMMENT 1:** T In the abstract, it is better to improve some sentences and the innovation and achievement of the paper that comprise it from other similar work is ambiguous and is better to add to the abstract. The introduction is not organized well and the lack of consistency in the story's narration is apparent. Please improve it if possible. Some modifications in terms of eliminating such general and clear information are needed.

**RESPONSE:** Thank you very much for the insightful comments. According to expert advice, we have substantially modified our manuscript in order to improve some sentences and the innovation and achievement of the paper that comprise it from other similar work is ambiguous and is better to add to the abstract. In addition, The introduction is reorganized and the consistency in the story's narration is improved. Some modifications in terms of eliminating such general and clear information are added in our revised paper. Please read our revised manuscript, thanks!

*Abstract: Hyperspectral images contain abundant spectral and spatial information of the surface of earth, which increase the difficulties of data processing and analysis, and sample labeling. In this paper, local binary pattern (LBP),*

*sparse representation and mixed logistic regression model are introduced to propose a sample labeling method based on neighborhood information and priority classifier discrimination. Then, a hyperspectral remote sensing image classification method based on texture features and semi-supervised learning is implemented. The LBP is employed to extract features of spatial texture information from remote sensing images and enrich the feature information of samples. The multivariate logistic regression model is used to select the unlabeled samples with the largest amount of information, and the unlabeled samples with neighborhood information and priority classifier tags are selected to obtain the pseudo-labeled samples after learning. By making full use of the advantages of sparse representation and mixed logistic regression model, a new classification model based on semi-supervised learning is constructed to effectively achieve accurate classification of hyperspectral images. The data of Indian Pines, Salinas scene and Pavia University are selected to verify the validity of the proposed method. The experiment results show that the proposed classification method obtains higher classification accuracy and shows stronger timeliness and generalization ability.*

**COMMENT 2:** Literature review is a little bit insufficient, please add more recent good works by researchers..

**RESPONSE:** Thank you very much for the insightful comments. According to expert advice, we have substantially modified our manuscript in order to add more recent good works by researchers, which can improve the reviews the literatures. Please read our revised manuscript, thanks!

- Camps-Valls G, Bandos T, Zhou D. (2007). Semi-supervised graph-based hyperspectral image classification. IEEE Transactions on Geoscience and Remote Sensing, 45(10):3044-3054.*
- Chang C, Kuo Y, Chen S, Liang C, Ma KY, Hu PF. (2021). Self-Mutual information-based band selection for hyperspectral image classification. IEEE Trans Geoscience and Remote Sensing, 59 (7): 5979-5997.*
- Chen C, Ma Y, Ren G. (2020). Hyperspectral classification using deep belief networks based on conjugate gradient update and pixel-centric spectral block features. IEEE Journal of Selected Topics in Applied Earth Observations and Remote Sensing, 13:4060-4069.*
- Chen GY. (2021). Multiscale filter-based hyperspectral image classification with PCA and SVM. Journal of Electrical Engineering, 72(1):pp. 40-45*
- Chen, HY, Fang M, Xu S. (2020). Hyperspectral remote sensing image classification with CNN based on quantum genetic-optimized sparse representation. IEEE Access, 8: 99900-99909.*
- Chen H, Miao F, Chen Y. (2021). A hyperspectral image classification method using multifeature vectors and optimized KELM. IEEE Journal of Selected Topics in Applied Earth Observations and Remote Sensing, 14: 2781-2795.*
- Chen Y, Nasser MN, Tran TD. (2011). Hyperspectral image classification using dictionary-based sparse representation. IEEE Transactions on Geoscience and Remote Sensing, 49(10):3973-3985.*
- Chen Y, Nasser MN, Tran TD. (2013). Hyperspectral image classification via kernel sparse representation. IEEE Transactions on Geoscience and Remote Sensing, 51(1):217-231.*
- Cui M, Prasad S. (2013). Multiscale sparse representation classification for robust hyperspectral image analysis. IEEE Global Conference on Signal and Information Processing, 969-972.*
- Deng W, Zhang L, Zhou X, et al. (2022). Multi-strategy particle swarm and ant colony hybrid optimization for airport taxiway planning problem. Information Sciences, 612: 576-593.*
- Duan Z, Song P, Yang C, et al. (2022). The impact of hyperglycaemic crisis episodes on long-term outcomes for inpatients presenting with acute organ injury: A prospective, multicentre follow-up study. Frontiers in Endocrinology, Doi: 10.3389/fendo.2022.1057089*
- Dou Z, Gao K, Zhang X, Wang H, Han L. (2020). Band selection of hyperspectral images using attention-based autoencoders. IEEE Geoscience and Remote Sensing Letters, 18 (1): 147-151.*

- Dumke I, Ludvigsen M, Ellefmo SL, Søreide F, Johnsen G, Murton B. (2019). Underwater hyperspectral imaging using a stationary platform in the transatlantic geotraverse hydrothermal field. *IEEE Transactions on Geoscience and Remote Sensing*, 57 (5): 2947-2962.
- Huang C, Zhou X, Ran X, et al.(2023). Co-evolutionary competitive swarm optimizer with three-phase for large-scale complex optimization problem. *Information Sciences*, 619:2-18.
- Huang C, Zhou X, Ran X, et al.(2023). Adaptive cylinder vector particle swarm optimization with differential evolution for UAV path planning . *Engineering Applications of Artificial Intelligence*,121:105942.
- Huang W, Huang Y, Wang H, Liu Y, Shim HJ. (2020). Local binary patterns and superpixel-based multiple kernels for hyperspectral image classification. *IEEE Journal of Selected Topics in Applied Earth Observations and Remote Sensing*, 13: 4550-4563.
- Hu S, Xu C, Peng J, Yan X, Long T. (2019).Weighted Kernel joint sparse representation for hyperspectral image classification. *IET Image Processing*, 13(2):254-260.
- Jiang X, Liu W, Zhang Y, Liu J, Li S, Lin J. (2020). Spectral-spatial hyperspectral image classification using dual-channel capsule networks. *IEEE Geoscience and Remote Sensing Letters*, 18 (6): 1094-1098.
- Liu ZX, Ma L, Du Q. (2021).Class-wise distribution adaptation for unsupervised classification of hyperspectral remote sensing images. *IEEE Transactions on Geoscience and Remote Sensing*, 59(1): 508-521
- Melgani F, Bruzzone L. (2004). Classification of hyperspectral remote sensing images with support vector machines. 2004. *IEEE Transactions on Geoscience and Remote Sensing*, 42(8):1778-1790.
- Ojala T, Harwood I. (1996).A comparative study of texture measures with classification based on feature distributions. *Pattern Recognition*29(1):51-59.
- Ratle, Terretaz-Zufferey, Kanevski, et al. (206). *Learning manifolds in forensic data. international conference on artificial neural networks. Springer, Berlin, Heidelberg.*
- Samiappan S, Moorhead R J. (2015). Semi-supervised co-training and active learning framework for hyperspectral image classification.2015 *IEEE International Geoscience and Remote Sensing Symposium(IGARSS)*, IEEE:401-404.
- Seifi M, Ghassemian H. (2017). A probabilistic SVM approach for hyperspectral image classification using spectral and texture features. *International Journal of Remote Sensing*, 38 (15): 4265-4284.
- Shang X, Song M, Chang CI. (2020). An iterative random training sample selection approach to constrained energy minimization for hyperspectral image classification. *IEEE Geoscience and Remote Sensing Letters*, 18 (9): 1625-1629.
- Shi C, Pun CM. (2019). Multiscale superpixel-based hyperspectral image classification using recurrent neural networks with stacked autoencoders. *IEEE Transactions on Multimedia*, 22 (2): 487-501.
- Song Y, Cai X, Zhou X, et al. (2022). Dynamic hybrid mechanism-based differential evolution algorithm and its application. *Expert Systems with Applications*, 213: 118834.
- Song Y, Zhao G, Zhang B, et al.(2023). An enhanced distributed differential evolution algorithm for portfolio optimization problems. *Engineering Applications of Artificial Intelligence*,121:106004
- Tan K, Li E, Qian D, et al. (2014). An efficient semi-supervised classification approach for hyperspectral imagery. *ISPRS Journal of Photogrammetry & Remote Sensing*, 97:36-45.
- Tang YY, Yuan H, Li L. (2014).Manifold-based sparse representation for hyperspectral image classification. *IEEE Transactions on Geoscience and Remote Sensing*, 52(12):7606-7618.
- Wang C, Wang H, Hu B, Jia W, Xu J, Li X. (2016). A novel spatial-spectral sparse representation for hyperspectral image classification based on neighborhood segmentation. *Spectroscopy and Spectral Analysis*, 36(9):2919-2924.
- Wang HR, Celik T. (2018). Sparse representation-based hyperspectral image classification. *Signal Image and Video Processing*, 12(5):1009-1017.
- Wang QY, Zhang Q, Zhang JP, Kang SQ, Wang YJ. (2022). Graph-based semisupervised learning with weighted features for hyperspectral remote sensing image classification. *IEEE Journal of Selected Topics in Applied Earth Observations and Remote Sensing*, 15: 6356-6370
- Xu J.; Zhao Y.; Chen H.; Deng W.(2023). ABC-GSPBFT: PBFT with grouping score mechanism and optimized consensus process for flight operation data-sharing. *Information Sciences*, 624:110-127.
- Xue ZH, Du PJ, Li J, Su HJ. (2017). Sparse graph regularization for hyperspectral remote sensing image classification. *IEEE Transactions on Geoscience and Remote Sensing*, 55(4): 2351-2366

- Yang C, Liu S C, Bruzzone L, et al. (2012). A semisupervised feature metric-based band selection method for hyperspectral image classification. *Hyperspectral Image and Signal Processing (WHISPERS), 2012 4th Workshop on. IEEE.*
- Yang M, Li CH, Guan J, Yan XS. (2018). A supervised-learning p-norm distance metric for hyperspectral remote sensing image classification. *IEEE Geoscience and Remote Sensing Letters*, 15(9): 1432-1436
- Yang X, Cao W, Lu Y, et al. (2022). Hyperspectral image transformer classification networks. *IEEE Transactions on Geoscience and Remote Sensing* 60: 1- 15. doi:10.1109/TGRS.2022.3171551
- Ye X, Ma J, Xiong H. (2021). Local affine preservation with motion consistency for feature matching of remote sensing images. *IEEE Transactions on Geoscience and Remote Sensing*, 60: 1-12.
- Yin J, Qi C, Chen Q, Qu J. (2021). Spatial-spectral network for hyperspectral image classification: A 3-D CNN and Bi-LSTM framework. *Remote Sensing*, 13 (12), 2353.
- Yu C, Liu C, Yu H, Song M, Chang CI.(2021). Unsupervised domain adaptation with dense-based compaction for hyperspectral imagery..*IEEE Journal of Selected Topics in Applied Earth Observations and Remote Sensing* 14: 12287–12299.
- Yu C, Zhou S, Song M, Chang CI. (2021). Semisupervised hyperspectral band selection based on dual-constrained low-rank representation. *IEEE Geoscience and Remote Sensing Letters*, 19: 1-5.
- Zhang CJ, Li GD, Du SH. (2019). Multi-scale dense networks for hyperspectral remote sensing image classification. *IEEE Transactions on Geoscience and Remote Sensing*, 57(11): 9201-9222
- Zhang J, Meng Z, Zhao F, Liu H, (2022). Chang Z. Convolution transformer mixer for hyperspectral image classification. *IEEE Geoscience and Remote Sensing Letters*, doi:10.1109/LGRS.2022.3208935.
- Zhao H, Wang C, Chen H, Chen T, Deng W.(2023). A hybrid classification method with dual-channel CNN and KELM for hyperspectral remote sensing images, *International Journal of Remote Sensing*, 44(1):289-310
- Zhang X, Wang H, Du C, et al.(2022). Custom-molded offloading footwear effectively prevents recurrence and amputation, and lowers mortality rates in high-risk diabetic foot patients: a multicenter, prospective observational study. *Diabetes, Metabolic Syndrome and Obesity: Targets and Therapy*, 15: 103-109
- Zhao XD, Zhang MM, Tao R, Li W, Liao WZ, Tian LF, Philips W. (2022). Fractional Fourier image transformer for multimodal remote sensing data classification. *IEEE Transactions on Neural Networks and Learning Systems*, doi: 10.1109/TNNLS.2022.3189994
- Zhang Z, Crawford M. (2016). Semi-supervised multi-metric active learning for classification of hyperspectral images. *2016 IEEE International Geoscience and Remote Sensing Symposium(IGARSS)*, IEEE:1843-1847.
- Zhao X, Zhang M, Tao R, et al.(2022). Fractional Fourier image transformer for multimodal remote sensing data classification. *IEEE Transactions on Neural Networks and Learning Systems* 1–13. doi:10.1109/TNNLS.2022.3189994.
- Zhong K, Zhou G, Deng W, et al. (2021). MOMPA: Multi-objective marine predator algorithm. *Computer Methods in Applied Mechanics and Engineering*, 385:114029.
- Zhou S, Xue Z, Du P. (2019). Semisupervised stacked autoencoder with cotraining for hyperspectral image classification. *IEEE Transactions on Geoscience and Remote Sensing* 57 (6): 3813–3826.

**COMMENT 3:** The quality of the figure should be improved as much as possible. For instance, in Fig.1,..

**RESPONSE:** Thank you very much for the insightful comments. According to expert advice, we have substantially modified our manuscript in order to improve the quality of the figures. Please read our revised manuscript, thanks!

|    |     |     |     |    |
|----|-----|-----|-----|----|
| 7  |     | ... |     | 28 |
|    | 79  | 26  | 78  |    |
|    | 132 | 68  | 10  |    |
|    | 30  | 202 | 252 |    |
| 24 |     | ... |     | 59 |

Figure 1. The quantized texture feature form of one region

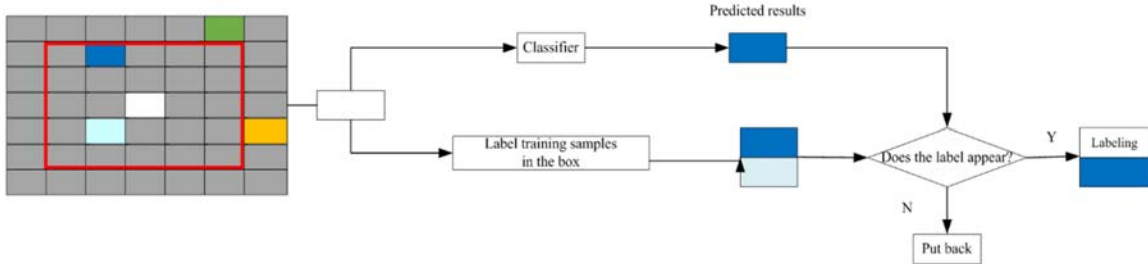

Figure 2. Sample labeling process based on neighborhood information and priority classifier discrimination

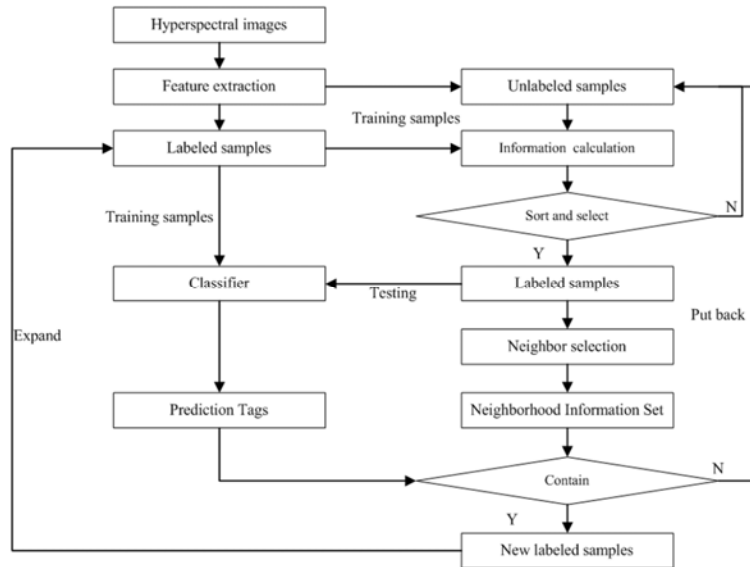

Figure 3. Hyperspectral image classification model based on texture features and semi-supervised learning

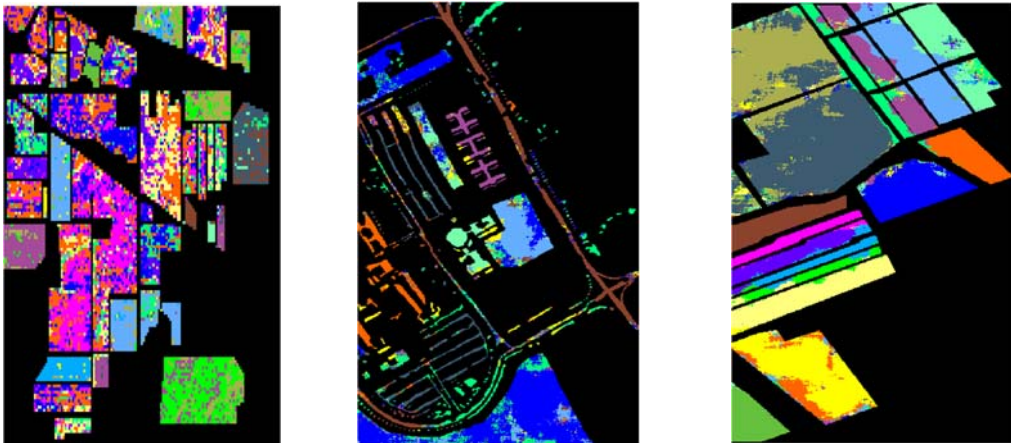

(a)Indian Pines (b)Pavia University (c)Salinas Scene

Figure 7 The classification results of the initial samples

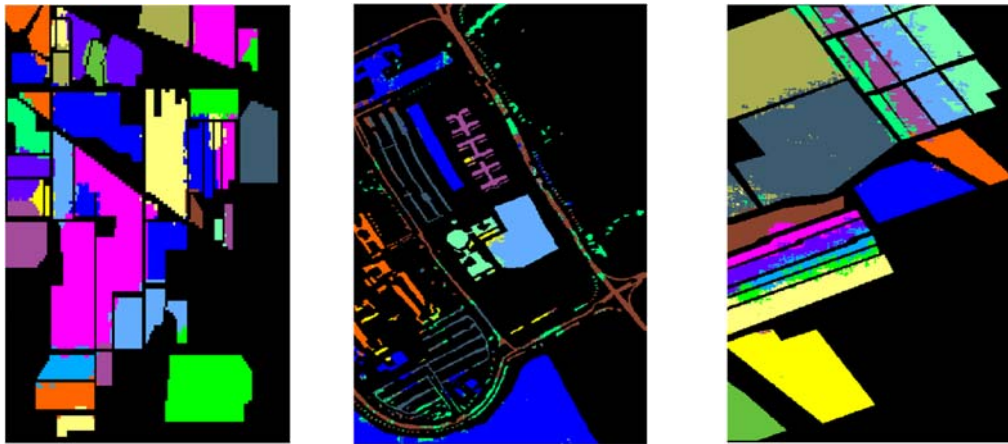

(a)Indian Pines (b)Pavia University (c)Salinas Scene

Figure 8 The classification results of the labeling samples

**COMMENT 4:** What are the limitations behind this study? This topic should be highlighted in the Conclusion of manuscript.

**RESPONSE:** Thank you very much for the insightful comments. In this stud, the proposed classification method has the more computing time, so the next step should be more in-depth research to reduce the time complexity. Therefore, this topic has highlighted in the Conclusion of manuscript. Please read our revised manuscript, thanks!

## 5. Conclusion

*However, the proposed classification method has the more computing time, so the next step should be more in-depth research to reduce the time complexity.*

**COMMENT 5:** The conclusions should be more concrete with data. Please improve them.

**RESPONSE:** Thank you very much for the insightful comments. According to expert advice, we have substantially modified our manuscript in order to add more concrete with data in the conclusions. Please read our revised manuscript, thanks!

## 6. Conclusion

*For the difficulties of hyperspectral image processing and analysis, a new sample labeling method based on neighborhood information and priority classifier discrimination is developed to implement a new hyperspectral remote sensing image classification method based on texture features and semi-supervised learning by introducing local binary model, sparse representation and mixed logistic regression model. The local binary pattern is employed to deal with the hyperspectral data and extract the texture features of the hyperspectral remote sensing image. The multivariate logistic regression model is used to select the unlabeled samples with the largest amount of information, and the unlabeled samples with neighborhood information and priority classifier tags are selected to obtain the pseudo-labeled samples after learning. The problem of limited labeled samples of hyperspectral images is solved. The data of Indian*

*Pines, Salinas scene and Pavia University are selected in here. The experiment results of the BT method are obviously better than those of other methods. The block window of Indian Pines dataset is 7\*7. The block windows of Pavia University and Salinas scene are 25 \* 25 and 20 \* 20, respectively. The combination of MLR and SRC can get better classification results. The obtained classification results by the classifier and the labeled samples are smoother and has fewer discrete points, which indicates that the generalization ability of the classifier is improved by labeling the samples from the classification visualization. For Indian Pines data, the classification results of AA, OA and KAPPA are 84.7%, 94.42% and 0.914, respectively. For Pavia University data, the classification results of AA, OA and KAPPA are 81.87%, 88.53% and 0.848, respectively. For Salinas Scene data, the classification results of AA, OA and KAPPA are 87.76%, 92.64% and 0.918, respectively. Therefore, the classification method obtains the higher classification accuracy.*

*However, the proposed classification method has the more computing time, so the next step should be more in-depth research to reduce the time complexity.*

**And so on, please read our revised manuscript. We thank the comments and the opportunity for us to improve our manuscript. As much as possible, the questions were taken into account during the preparation of the revised manuscript. We hope that the manuscript is now suitable for publication.**
